# Supplementary material for: Light-dependent activation of G proteins by two isoforms of chicken melanopsins
Source: Royal Society of Chemistry journal article supplement (doi:10.1039/c5pp00153f), 2015-09-11
Supplement: c5pp00153f1.pdf [file c5pp00153f1.pdf]

**Supplementary table 1:** Summary of the multiple comparison tests of the G protein activation assays (Figure 2A–C, Figure 3A–C).

| Opsin–G   | Reaction Time (min) | Statistical significance* |     |      |     |
|-----------|---------------------|---------------------------|-----|------|-----|
|           |                     | Light                     |     | Dark |     |
|           |                     | G+                        | G–  | G+   | G–  |
| OPNP–Gt   | 2                   | A                         | B   | C    | B   |
|           | 4                   | A                         | B   | C    | B   |
| OPN4-1–Gt | 2                   | A                         | A   | A    | A   |
|           | 4                   | A                         | A   | A    | A   |
|           | 2 + 4               | A                         | A,B | B    | B   |
| OPN4-2–Gt | 2                   | A                         | A   | B    | B   |
|           | 4                   | A                         | B   | C    | C   |
|           | 2 + 4               | A                         | B   | C    | C   |
| OPNP–Gq   | 2                   | A                         | A   | A    | A   |
|           | 4                   | A                         | A   | A    | A   |
|           | 2 + 4               | A                         | A   | A    | A   |
| OPN4-1–Gq | 2                   | A                         | B   | A,B  | B   |
|           | 4                   | A                         | B   | A,B  | A,B |
|           | 2 + 4               | A                         | B   | B    | B   |
| OPN4-2–Gq | 2                   | A                         | A   | B    | B   |
|           | 4                   | A                         | A   | B    | B   |
|           | 2 + 4               | A                         | A   | B    | B   |

\* A pair of the groups sharing no common letters (A, B, or C) is significantly different from each other. Significance level, 0.05.
